# Supplementary material
Source: PubMed Central journal article supplement (PMC8324493)
Supplement: mmc1.pdf [file mmc1.pdf]

**Cell Reports Medicine, Volume 2**

**Supplemental information**

**Impact of SARS-CoV-2 variants on the total  
CD4<sup>+</sup> and CD8<sup>+</sup> T cell reactivity in infected  
or vaccinated individuals**

**Alison Tarke, John Sidney, Nils Methot, Esther Dawen Yu, Yun Zhang, Jennifer M. Dan, Benjamin Goodwin, Paul Rubiro, Aaron Sutherland, Eric Wang, April Frazier, Sydney I. Ramirez, Stephen A. Rawlings, Davey M. Smith, Ricardo da Silva Antunes, Bjoern Peters, Richard H. Scheuermann, Daniela Weiskopf, Shane Crotty, Alba Grifoni, and Alessandro Sette**

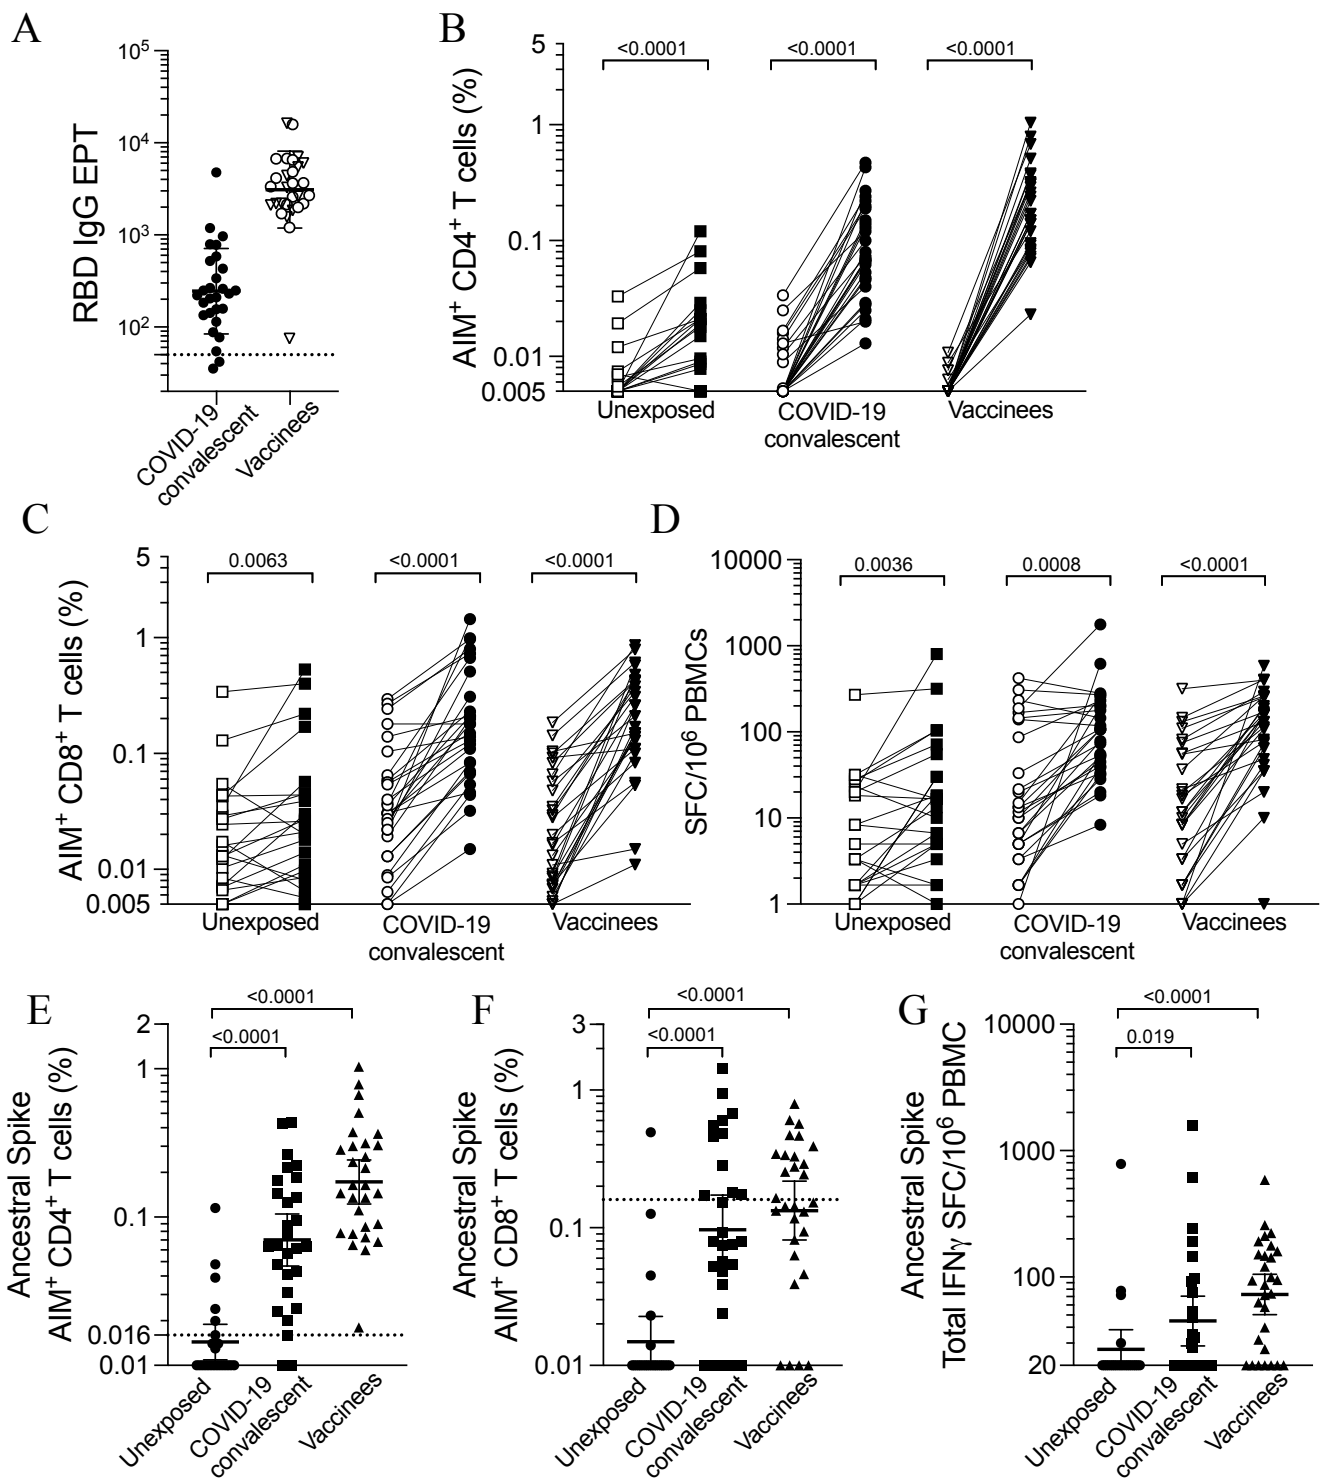

**Fig. S1. SARS-CoV-2 serology, DMSO controls, and ancestral Spike MP responses for all the cohorts analyzed in this study, related to Figures 1, 2 and 3 and Table 1.**

(A) Spike RBD serology in COVID-19 convalescents (n=28, filled circles) and COVID-19 vaccinees (Pfizer/BioNTech BNT162b2 (n=14, open triangles) and Moderna COVID-19 vaccinees (n=15, open circles)). Unexposed donors (n=23, not plotted) were seronegative or collected prior to the emergence of SARS-CoV-2. (B-C) AIM<sup>+</sup> CD4<sup>+</sup> (B) or CD8<sup>+</sup> (C) T cells stimulated with DMSO or the ancestral S MP at 1 $\mu$ g/mL. (D) IFN<sub>γ</sub> SFC per million PBMC stimulated with DMSO or the ancestral S MP at 1 $\mu$ g/mL.

(E-F) AIM<sup>+</sup> CD4<sup>+</sup> (E) or CD8<sup>+</sup> (F) T cells stimulated with the ancestral S MP at 1 $\mu$ g/mL. Dotted black lines indicate the threshold of positivity calculated based on median +2 SD of the DMSO controls (>80). Data is plotted after background subtraction and SI>2. (G) IFN<sub>γ</sub> SFC per million PBMC stimulated with the ancestral S MP at 1 $\mu$ g/mL. Data is plotted after background subtraction, SI>2, and p value <0.05 by Poisson or T test.

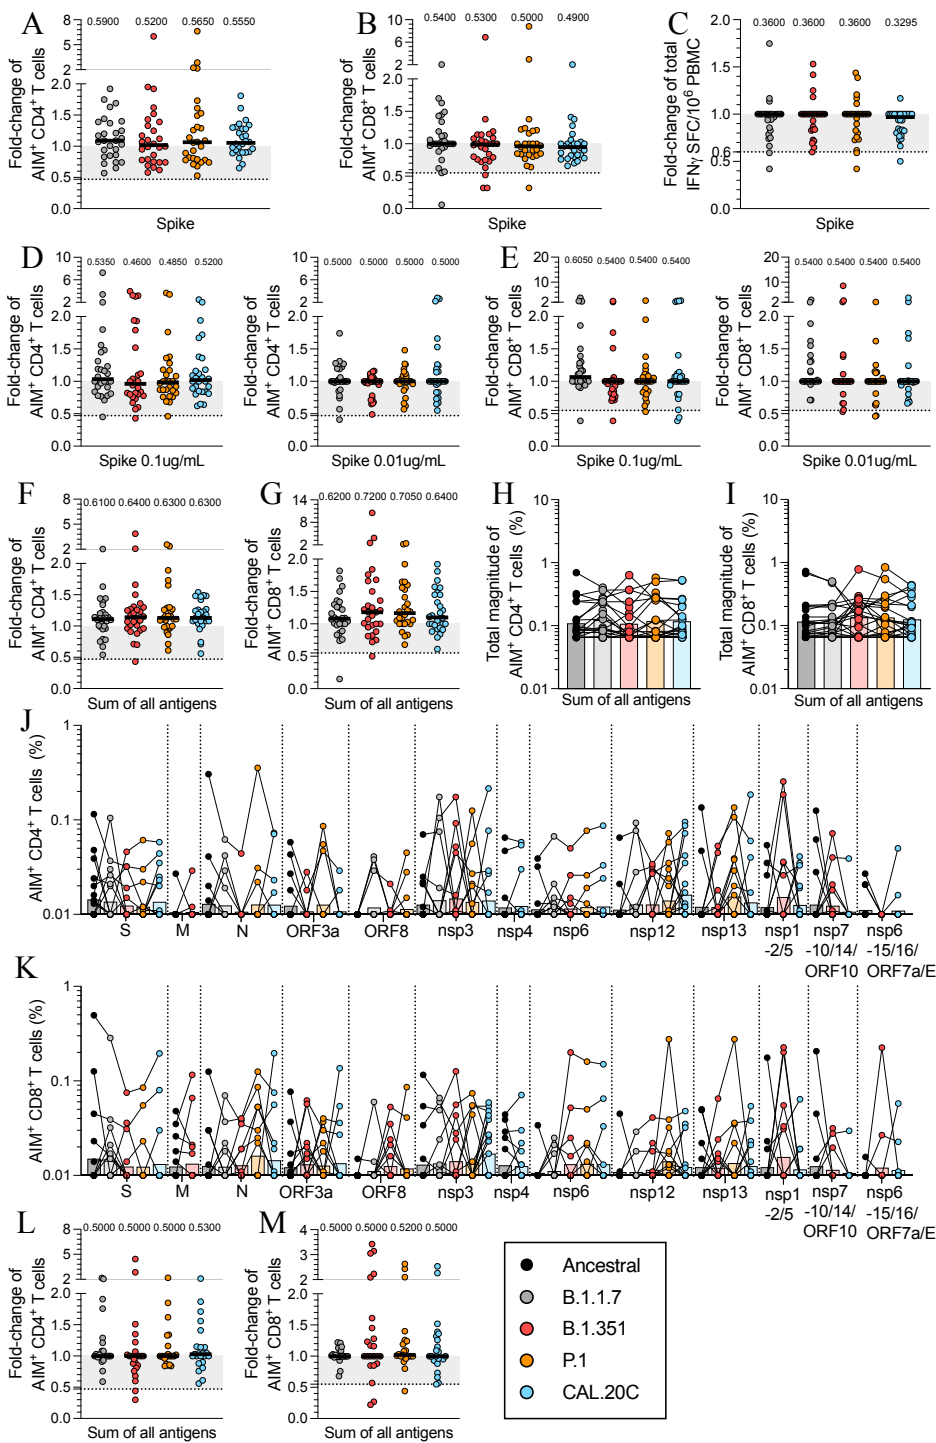

**Fig. S2. Fold-change analyses of convalescent COVID-19 and unexposed donor responses to variant MPs, Related to Figures 1 and 2.**

(A-G) Convalescent COVID-19 (n = 28) and (H-M) unexposed (n = 23) donors were stimulated with SARS-CoV-2 MPs corresponding to the ancestral reference strain (black) and the B.1.1.7 (grey), B.1.351 (red), P.1 (orange) and CAL.20C (light blue) SARS-CoV-2 variants. (A-B) Fold-change of AIM<sup>+</sup> CD4<sup>+</sup> (A) and CD8<sup>+</sup> (B) T cells with S MPs at 1ug/mL. (C) Fold-change of total IFN<sub>γ</sub> SFC/10<sup>6</sup> PBMC with S MPs at 1ug/mL. (D-E) Fold-change of AIM<sup>+</sup> CD4<sup>+</sup> (D) and CD8<sup>+</sup> (E) T cells with Spike MPs at 0.1 and 0.01 ug/mL. (F-G) Fold-change of the sum of AIM<sup>+</sup> CD4<sup>+</sup> (F) and CD8<sup>+</sup> (G) T cells for all SARS-CoV-2 antigens. (H-I) Percentages of AIM<sup>+</sup> (OX40<sup>+</sup>CD137<sup>+</sup>) CD4<sup>+</sup> T cells (H) and AIM<sup>+</sup> (CD69<sup>+</sup>CD137<sup>+</sup>) CD8<sup>+</sup> T cells (I) for the total reactivity. (J-K) Percentages of AIM<sup>+</sup> (OX40<sup>+</sup>CD137<sup>+</sup>) CD4<sup>+</sup> T cells (J) and AIM<sup>+</sup> (CD69<sup>+</sup>CD137<sup>+</sup>) CD8<sup>+</sup> T cells (K) for each MP. Bars represent the geometric mean. (L-M) Fold-change of the sum of AIM<sup>+</sup> CD4<sup>+</sup> (L) and CD8<sup>+</sup> (M) T cells for all SARS-CoV-2 antigens in unexposed donors. p values listed at the top of graphs correspond to the discrepancy and were calculated by one sample Wilcoxon Signed Rank test compared to the lower bound fold change threshold of 0.47 for CD4 AIM<sup>+</sup>, 0.55 for CD8 AIM<sup>+</sup>, and 0.6 for IFN<sub>γ</sub> SFC/10<sup>6</sup> PBMC.

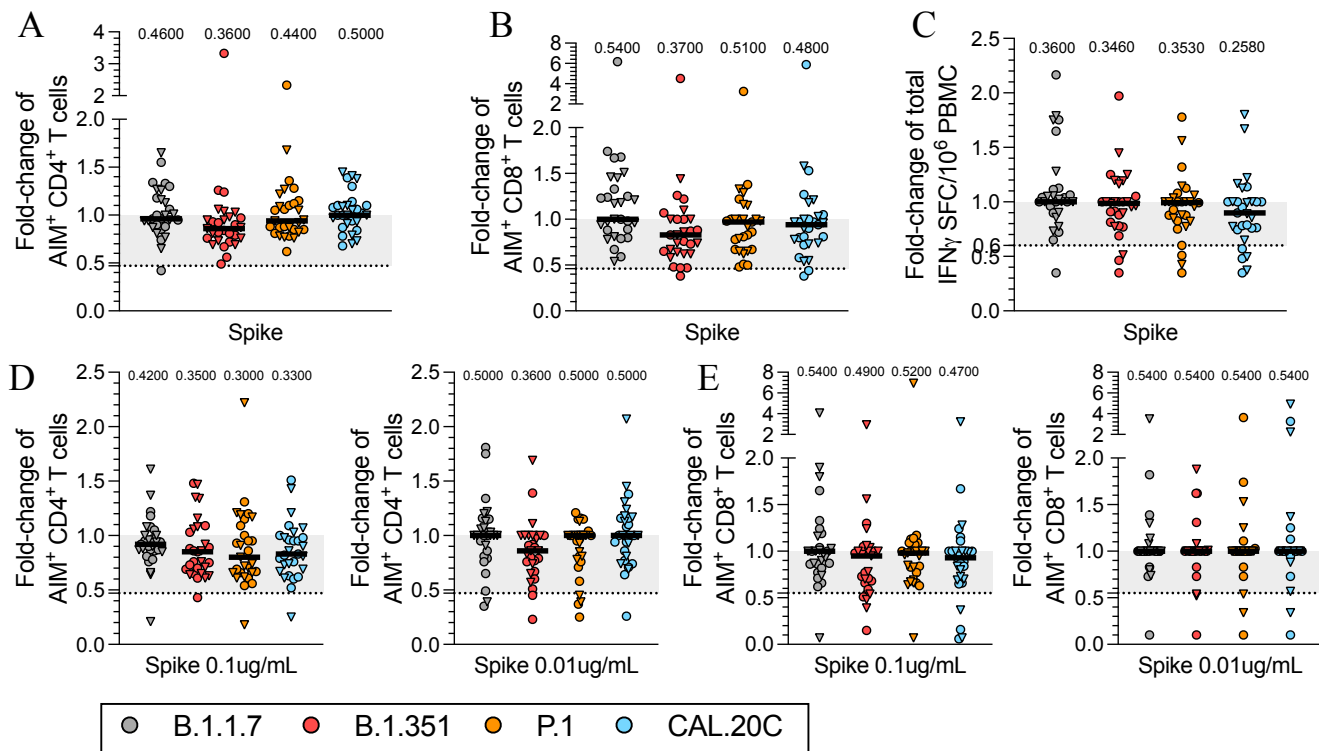

**Figure S3. Fold-change analyses of COVID-19 vaccinees tested with the variant MPs, related to Figure 3.**

PBMCs of Pfizer/BioNTech BNT162b2 (n=14, triangles) and Moderna COVID-19 vaccines (n=15, circles) were stimulated with the Spike MPs corresponding to the ancestral reference strain (black) and the B.1.1.7 (grey), B.1.351 (red), P.1 (orange) and CAL.20C (light blue) SARS-CoV-2 variants. **(A-B)** Fold-change of AIM<sup>+</sup> CD4<sup>+</sup> **(A)** and CD8<sup>+</sup> **(B)** T cells with Spike MPs at 1ug/mL. **(C)** Fold-change of total IFN<sub>γ</sub> SFC/10<sup>6</sup> PBMC with Spike MPs at 1ug/mL. **(D-E)** Fold-change of AIM<sup>+</sup> CD4<sup>+</sup> **(D)** and CD8<sup>+</sup> **(E)** T cells with Spike MPs at 0.1 and 0.01 ug/mL. p values listed at the top of graph correspond to the discrepancy and were calculated by one sample Wilcoxon Signed Rank test compared to the lower bound fold change threshold of 0.47 for CD4 AIM<sup>+</sup>, 0.55 for CD8 AIM<sup>+</sup>, and 0.6 for IFN<sub>γ</sub> SFC/10<sup>6</sup> PBMC.

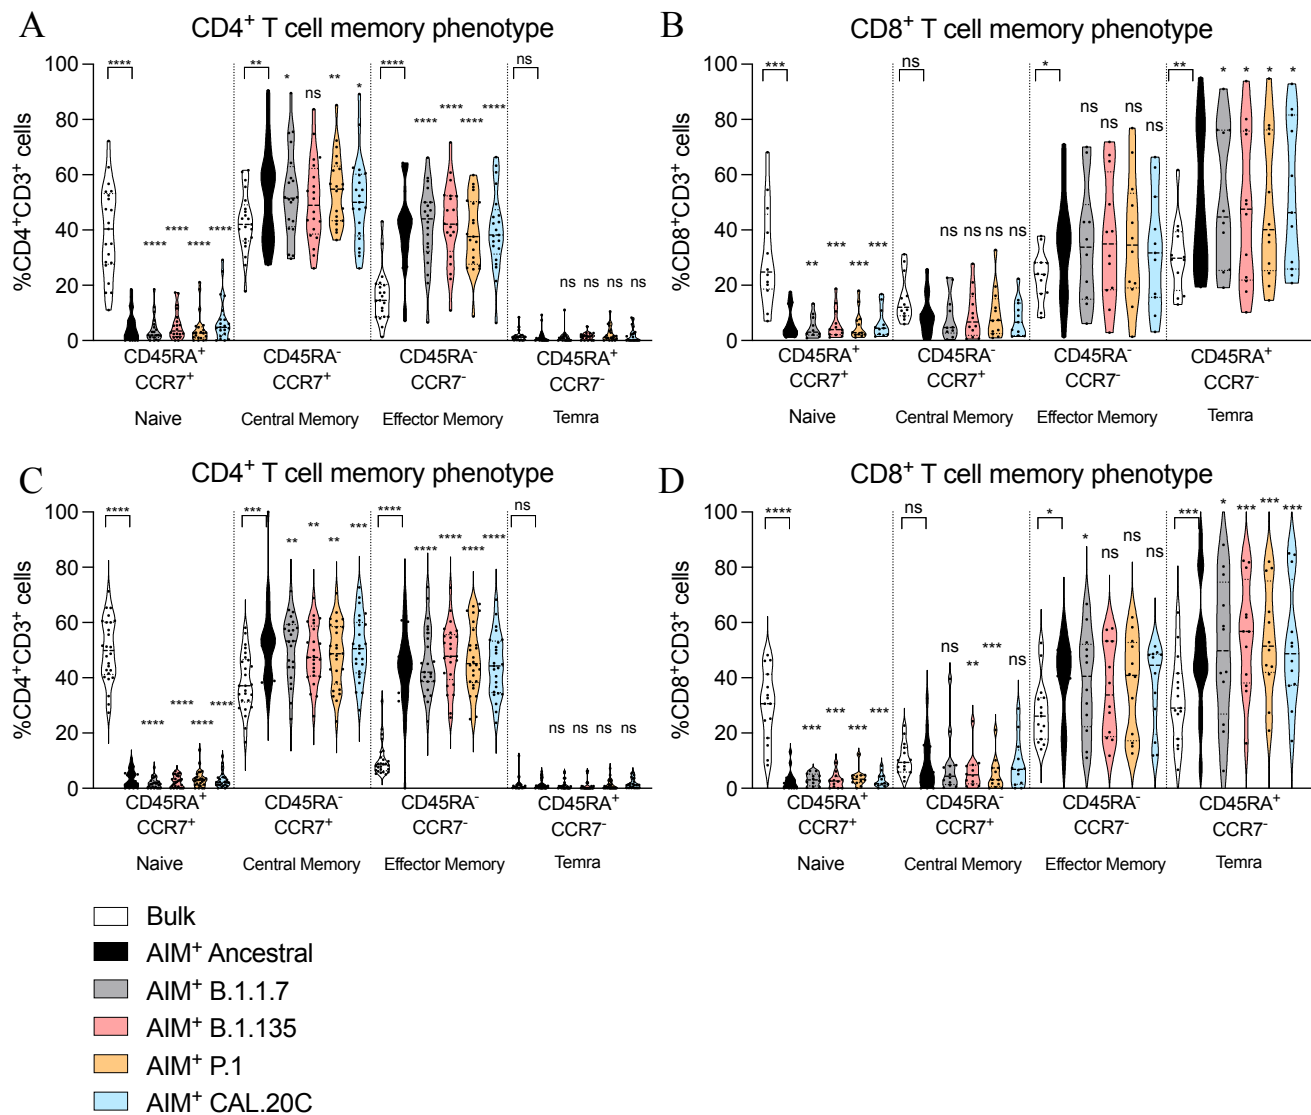

**Figure S4. Memory phenotype of COVID-19 convalescent and vaccinated donors, related to Figures 1, 2, and 3.**

(A-B) The memory phenotype of COVID-19 convalescent donors ( $n = 28$ ) was analyzed to determine the makeup of naïve ( $CD45RA^+CCR7^+$ ), central memory ( $CD45RA^-CCR7^+$ ), effector memory ( $CD45RA^-CCR7^-$ ), and terminally differentiated effector memory ( $CD45RA^+CCR7^-$ ) in the bulk and SARS-CoV-2 AIM<sup>+</sup> populations for CD4<sup>+</sup> (A) and CD8<sup>+</sup> (B) T cells. (C-D) The memory phenotype was also analyzed for the COVID-19 vaccinees ( $n = 29$ ) for CD4<sup>+</sup> (C) and CD8<sup>+</sup> (D) T cells. The violin plots represent the bulk CD4<sup>+</sup> or CD8<sup>+</sup> T cell populations (white) or the subsets of AIM<sup>+</sup> T cells positive for the ancestral reference strain (black) and the B.1.1.7 (grey), B.1.135 (red), P.1 (orange) and CAL.20C (light blue) SARS-CoV-2 variants.  $p$  values were calculated comparing the bulk population to the AIM<sup>+</sup> populations separately for each variant by two-tailed Wilcoxon test.

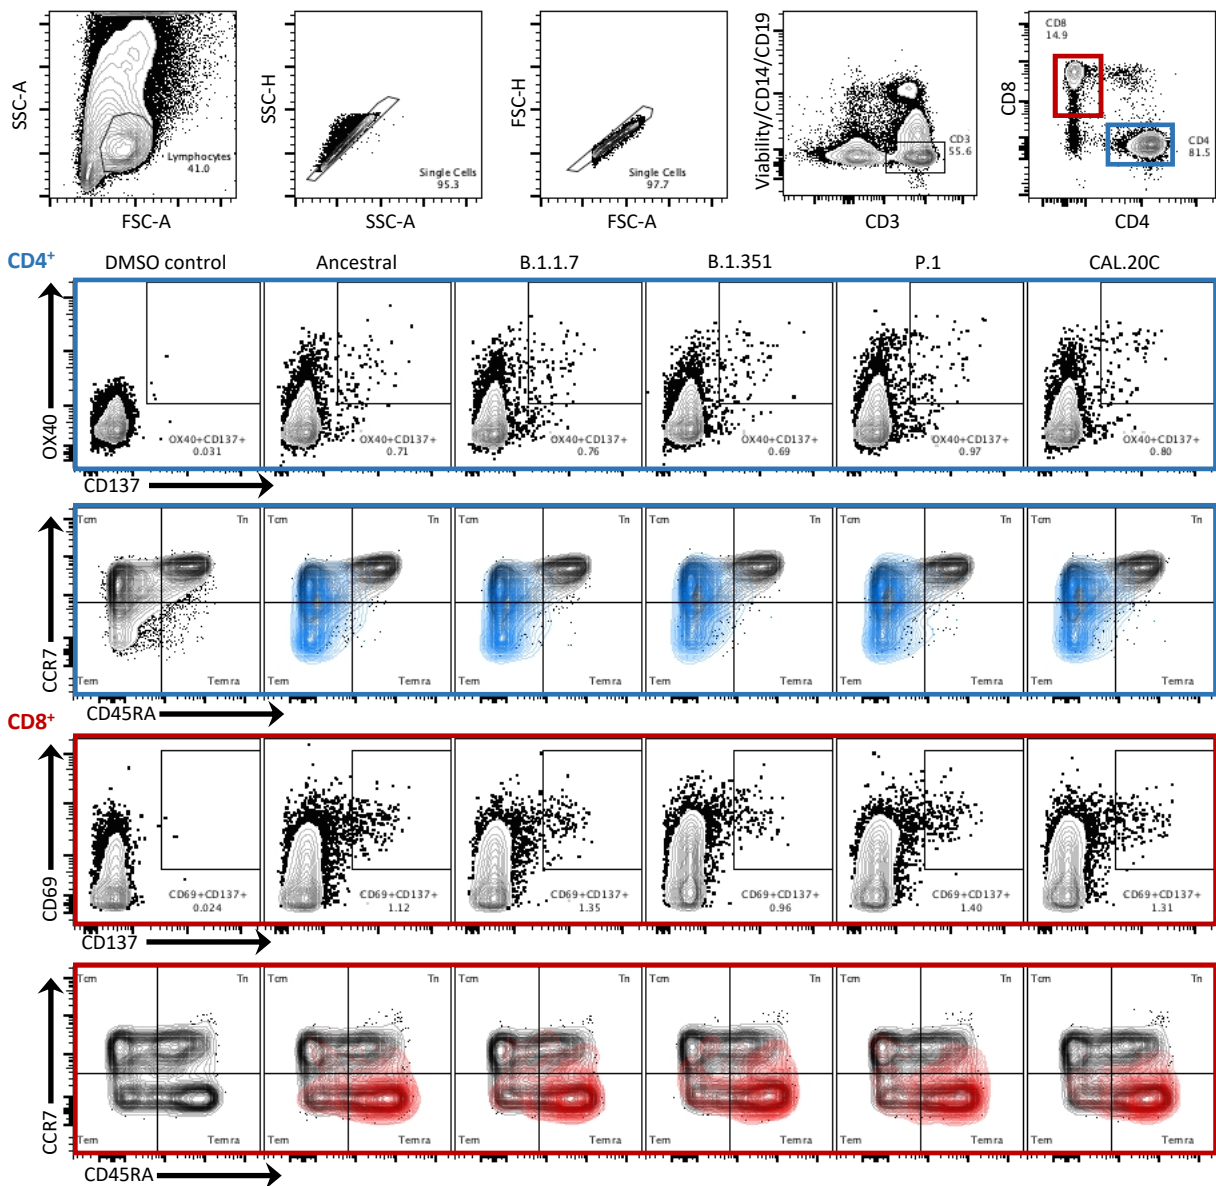

**Figure S5. Gating strategy for AIM assay and memory phenotyping, related to Figures 1, 2, and 3.**

Representative graphs illustrating the gating strategy used in the flow cytometry AIM assays in order to define antigen-specific CD4<sup>+</sup> (outlined in blue) and CD8<sup>+</sup> (outlined in red) T cells by the expression of OX40<sup>+</sup>CD137<sup>+</sup> and CD69<sup>+</sup>CD137<sup>+</sup>, respectively. The memory compartment was analyzed by gating naïve (CD45RA<sup>+</sup>CCR7<sup>+</sup>), central memory (CD45RA<sup>-</sup>CCR7<sup>+</sup>), effector memory (CD45RA<sup>-</sup>CCR7<sup>-</sup>), and terminally differentiated effector memory (CD45RA<sup>+</sup>CCR7<sup>-</sup>) cells on the bulk CD4<sup>+</sup> and CD8<sup>+</sup> T cells as well as the AIM<sup>+</sup> subsets, overlaid in blue and red, respectively. These graphs depict one of the COVID-19 convalescent donors from this study tested with each of the VOCs S MP and are representative of the gating strategy utilized with all donors tested.

**Table S1.** Related to Figures 1, 2, 3 and 4. List of amino acid positions and relative

| Protein | Amino acid position | Ancestral (Wu) | B.1.1.7 (UK) | B.1.351 (SA) | P.1. (BR) | CAL.20C (CA) |
|---------|---------------------|----------------|--------------|--------------|-----------|--------------|
| S       | 13                  | S              |              |              |           | I            |
| S       | 18                  | L              |              | F            | F         |              |
| S       | 20                  | T              |              |              | N         |              |
| S       | 26                  | P              |              |              | S         |              |
| S       | 69                  | H              | Del          |              |           |              |
| S       | 70                  | V              | Del          |              |           |              |
| S       | 80                  | D              |              | A            |           |              |
| S       | 138                 | D              |              |              | Y         |              |
| S       | 145                 | Y              | Del          |              |           |              |
| S       | 152                 | W              |              |              |           | C            |
| S       | 190                 | R              |              |              | S         |              |
| S       | 215                 | D              |              | G/H          |           |              |
| S       | 241                 | L              |              | Del          |           |              |
| S       | 242                 | L              |              | Del          |           |              |
| S       | 243                 | A              |              | Del          |           |              |
| S       | 417                 | K              |              | N            | T         |              |
| S       | 452                 | L              |              |              |           | R            |
| S       | 484                 | E              |              | K            | K         |              |
| S       | 501                 | N              | Y            | Y            | Y         |              |
| S       | 570                 | A              | D            |              |           |              |
| S       | 614                 | D              | G            | G            | G         | G            |
| S       | 655                 | H              |              |              | Y         |              |
| S       | 681                 | P              | H            |              |           |              |
| S       | 701                 | A              |              | V            |           |              |
| S       | 716                 | T              | I            |              |           |              |
| S       | 938                 | L              |              |              |           | F            |
| S       | 982                 | S              | A            |              |           |              |
| S       | 1027                | T              |              |              | I         |              |
| S       | 1118                | D              | H            |              |           |              |
| S       | 1176                | V              |              |              | F         |              |
| S       | 1191                | K              |              |              |           | N            |
| M       | 162                 | K              |              | N            |           |              |
| N       | 3                   | D              | L            |              |           |              |
| N       | 13                  | P              |              | S            |           |              |
| N       | 32                  | R              |              | H            |           |              |
| N       | 80                  | P              |              |              | R         |              |
| N       | 203                 | R              | K            |              | K         | K            |
| N       | 204                 | G              | R            |              | R         | R            |
| N       | 205                 | T              |              | I            |           | I            |
| N       | 212                 | G              |              | C            |           |              |
| N       | 234                 | M              |              |              |           | I            |
| N       | 235                 | S              | F            |              |           |              |
| E       | 71                  | P              |              | L            |           |              |
| ORF3a   | 57                  | Q              |              | H            |           | H            |
| ORF3a   | 131                 | W              |              | L            |           |              |
| ORF3a   | 171                 | S              |              | L            |           |              |
| ORF3a   | 253                 | S              |              |              | P         |              |
| ORF7a   | 93                  | V              |              | F            |           |              |

|       |      |   |      |     |     |   |
|-------|------|---|------|-----|-----|---|
| ORF8  | 27   | - | Stop |     |     |   |
| ORF8  | 92   | E |      |     | K   |   |
| ORF8  | 121  | I |      | L   |     |   |
| nsp1  | 109  | P |      | S   |     |   |
| nsp2  | 85   | T |      | I   |     | I |
| nsp2  | 339  | G |      | S   |     |   |
| nsp2  | 366  | S |      | T   |     |   |
| nsp2  | 427  | Q |      | H   |     |   |
| nsp2  | 563  | E |      | D   |     |   |
| nsp3  | 183  | T | I    |     |     |   |
| nsp3  | 186  | T |      |     | A   |   |
| nsp3  | 370  | S |      |     | L   |   |
| nsp3  | 778  | P |      |     |     | S |
| nsp3  | 837  | K |      | N   |     |   |
| nsp3  | 890  | A | D    |     |     |   |
| nsp3  | 926  | C |      | S   |     |   |
| nsp3  | 977  | K |      |     | Q   |   |
| nsp3  | 1180 | T |      | I   |     |   |
| nsp3  | 1412 | I | T    |     |     |   |
| nsp3  | 1778 | N |      | S   |     |   |
| nsp4  | 395  | S |      |     |     | T |
| nsp5  | 90   | K |      | R   |     |   |
| nsp5  | 193  | A |      | V   |     |   |
| nsp6  | 106  | S | Del  | Del | Del |   |
| nsp6  | 107  | G | Del  | Del | Del |   |
| nsp6  | 108  | F | Del  | Del | Del |   |
| nsp6  | 125  | L |      |     |     | F |
| nsp6  | 135  | G |      | S   |     |   |
| nsp6  | 149  | V |      | F   |     |   |
| nsp6  | 167  | L |      |     |     | F |
| nsp9  | 65   | I |      |     |     | V |
| nsp10 | 105  | N |      | K   |     |   |
| nsp12 | 323  | P | L    | L   | L   | L |
| nsp13 | 53   | P |      |     |     | L |
| nsp13 | 209  | V |      |     |     | F |
| nsp13 | 260  | D |      |     |     | Y |
| nsp13 | 341  | E |      |     | D   |   |
| nsp13 | 588  | T |      | I   |     |   |
| nsp14 | 177  | L |      | F   |     |   |
| nsp14 | 326  | F |      |     |     | L |
| nsp14 | 328  | V |      | F   |     |   |
| nsp15 | 91   | D |      |     |     | Y |



**Table S2.** Related to Figures 1, 2, 3 and 4. List of mutated peptides with respect to the ancestral Wuhan strain in the different variants studied.

| Protein | Aminoacid position (Start) | Aminoacid position (End) | SARS-CoV-2 strain | Sequence         |
|---------|----------------------------|--------------------------|-------------------|------------------|
| nsp3    | 173                        | 187                      | B.1.1.7           | QDGEDNQTTIIQTI   |
| nsp3    | 178                        | 192                      | B.1.1.7           | DNQTTIIQTIVEVQP  |
| nsp3    | 183                        | 197                      | B.1.1.7           | IITQIVEVQPQLEME  |
| nsp3    | 878                        | 892                      | B.1.1.7           | QDAYYRARAGEADNF  |
| nsp3    | 883                        | 897                      | B.1.1.7           | RARAGEADNFCALIL  |
| nsp3    | 888                        | 902                      | B.1.1.7           | EADNFCALILAYCNK  |
| nsp3    | 1398                       | 1412                     | B.1.1.7           | NYLKSPPNFSKLINIT |
| nsp3    | 1403                       | 1417                     | B.1.1.7           | PNFSKLINITWFL    |
| nsp3    | 1408                       | 1422                     | B.1.1.7           | LINITWFLLSVCL    |
| nsp6    | 92                         | 106                      | B.1.1.7           | MRIMTWLDMVDTSLK  |
| nsp6    | 97                         | 111                      | B.1.1.7           | WLDMDVDTSLKDKCV  |
| nsp6    | 102                        | 116                      | B.1.1.7           | DTSLKDKDCVMYASA  |
| nsp6    | 107                        | 121                      | B.1.1.7           | KLKDCVMYASAVLL   |
| nsp12   | 309                        | 323                      | B.1.1.7           | HCANFNVLFTVFP    |
| nsp12   | 314                        | 328                      | B.1.1.7           | NVLFSTVFPVTSFGP  |
| nsp12   | 319                        | 333                      | B.1.1.7           | TVFPVTSFGPLVVRKI |
| N       | 1                          | 15                       | B.1.1.7           | MSLNGPQNQRNAPRI  |
| N       | 191                        | 205                      | B.1.1.7           | RNSSRNSTPGSSKRT  |
| N       | 196                        | 210                      | B.1.1.7           | NSTPGSSKRTSPARM  |
| N       | 201                        | 215                      | B.1.1.7           | SSKRTSPARMAGNGG  |
| N       | 221                        | 235                      | B.1.1.7           | LLLLDRLNQLESKMF  |
| N       | 226                        | 240                      | B.1.1.7           | RLNQLESKMFQKGGQ  |
| N       | 231                        | 245                      | B.1.1.7           | ESKMFQKGGQQQGT   |
| ORF8    | 41                         | 55                       | B.1.1.7           | FYSKWYIRVGAIKSA  |
| ORF8    | 46                         | 60                       | B.1.1.7           | YIRVGAIKSAPLIEL  |
| ORF8    | 51                         | 65                       | B.1.1.7           | AIKSAPLIELCVDEA  |
| ORF8    | 61                         | 75                       | B.1.1.7           | CVDEAGSKSPIQCID  |
| ORF8    | 66                         | 80                       | B.1.1.7           | GSKSPIQCIDIGNYT  |
| ORF8    | 71                         | 85                       | B.1.1.7           | IQCIDIGNYTVSCLP  |
| S       | 56                         | 70                       | B.1.1.7           | LPFFSNVTFWHAISG  |
| S       | 61                         | 75                       | B.1.1.7           | NVTFWHAISGTNGTK  |
| S       | 66                         | 80                       | B.1.1.7           | HASGTNGTKRFDNP   |
| S       | 131                        | 145                      | B.1.1.7           | CEFQFCNDPFLGVYH  |
| S       | 136                        | 150                      | B.1.1.7           | CNDPFLGVYHKNKNS  |
| S       | 141                        | 155                      | B.1.1.7           | LGVYHKNKNSWMESE  |
| S       | 491                        | 505                      | B.1.1.7           | PLQSYGFQPTYGVGY  |
| S       | 496                        | 510                      | B.1.1.7           | GFQPTYGVGYQPYRV  |
| S       | 501                        | 515                      | B.1.1.7           | YGVGYQPYRVVLSF   |
| S       | 556                        | 570                      | B.1.1.7           | NKKFLPFQFGRDID   |
| S       | 561                        | 575                      | B.1.1.7           | PFQFGRDIDDTDA    |
| S       | 566                        | 580                      | B.1.1.7           | GRDIDDTDAVRDPQ   |
| S       | 601                        | 615                      | B.1.1.7           | GTNTSNQVAVLYQGV  |
| S       | 606                        | 620                      | B.1.1.7           | NQVAVLYQGVNCTEV  |
| S       | 611                        | 625                      | B.1.1.7           | LYQGVNCTEVPVAIH  |
| S       | 671                        | 685                      | B.1.1.7           | CASYQTQTNSHRRAR  |
| S       | 676                        | 690                      | B.1.1.7           | TQTNSHRRARSVASQ  |
| S       | 681                        | 695                      | B.1.1.7           | HRRARSVASQSHIAY  |
| S       | 706                        | 720                      | B.1.1.7           | AYSNNIAIPINFTE   |
| S       | 711                        | 725                      | B.1.1.7           | SIAIPINFTEISVTE  |
| S       | 716                        | 730                      | B.1.1.7           | INFTEISVTEILPVS  |
| S       | 971                        | 985                      | B.1.1.7           | GAISSVLNDILARLD  |
| S       | 976                        | 990                      | B.1.1.7           | VLNDILARLDKVEAE  |
| S       | 981                        | 995                      | B.1.1.7           | LARLDKVEAEVQIDR  |
| S       | 1106                       | 1120                     | B.1.1.7           | QRNFYEPQIITHTNT  |
| S       | 1111                       | 1125                     | B.1.1.7           | EPQIITHTNTFVSGN  |
| S       | 1116                       | 1130                     | B.1.1.7           | TTHTNTFVSGNCDVVI |
| N       | 1                          | 15                       | B.1.351           | MSDNGPQNQRNASRI  |
| N       | 6                          | 20                       | B.1.351           | PQNQRNASRITFGGP  |
| N       | 11                         | 25                       | B.1.351           | NASRITFGGSDSTG   |
| N       | 21                         | 35                       | B.1.351           | SDSTGNSQNGEHSQA  |
| N       | 26                         | 40                       | B.1.351           | SNQNGEHSGARSKQR  |
| N       | 31                         | 45                       | B.1.351           | EHSGARSKQRRPQGL  |
| N       | 191                        | 205                      | B.1.351           | RNSSRNSTPGSSRGI  |
| N       | 196                        | 210                      | B.1.351           | NSTPGSSRGISPARM  |
| N       | 201                        | 215                      | B.1.351           | SSRGISPARMACNGG  |
| N       | 206                        | 220                      | B.1.351           | SPARMACNGGDAALA  |
| N       | 211                        | 225                      | B.1.351           | ACNGGDAALALLLD   |
| ORF8    | 107                        | 121                      | B.1.351           | DFLEYHDVVRVLDLFL |
| ORF7a   | 81                         | 95                       | B.1.351           | SVSPKLFIRQEEFQE  |
| ORF7a   | 86                         | 100                      | B.1.351           | LFIRQEEFQELYSPI  |
| ORF7a   | 91                         | 105                      | B.1.351           | EEFQELYSPIFLIVA  |
| M       | 151                        | 165                      | B.1.351           | IAGHHLGRCDINDLP  |
| M       | 156                        | 170                      | B.1.351           | LGRCDINDLPKEITV  |
| M       | 161                        | 175                      | B.1.351           | INDLPKEITVATSRT  |
| ORF3a   | 46                         | 60                       | B.1.351           | LIVGVALAVFHSAS   |
| ORF3a   | 51                         | 65                       | B.1.351           | ALLAVFHSASKIITL  |
| ORF3a   | 56                         | 70                       | B.1.351           | FHSASKIITLKKRWQ  |
| ORF3a   | 121                        | 135                      | B.1.351           | VRIMRLWLCLKCRS   |
| ORF3a   | 126                        | 140                      | B.1.351           | RLWLCLKCRSKNPLL  |
| ORF3a   | 131                        | 145                      | B.1.351           | LKCRSKNPLLYDANY  |
| ORF3a   | 161                        | 175                      | B.1.351           | NSVTSSIVITLGDGT  |
| ORF3a   | 166                        | 180                      | B.1.351           | SIVITLGDGTTSPIS  |
| ORF3a   | 171                        | 185                      | B.1.351           | LGDGTTSPISEHDYQ  |
| nsp1    | 96                         | 110                      | B.1.351           | QYGRSGETLGLVSH   |
| nsp1    | 101                        | 115                      | B.1.351           | GETLGLVSHVGEIP   |
| nsp1    | 106                        | 120                      | B.1.351           | VLVSHVGEIPVAYRK  |
| nsp5    | 183                        | 197                      | B.1.351           | GPVDRQTAQVAGTD   |
| nsp5    | 188                        | 202                      | B.1.351           | RQTAQVAGTDTTITV  |
| nsp5    | 193                        | 207                      | B.1.351           | VAGTDTTITVNVLAW  |
| nsp10   | 93                         | 107                      | B.1.351           | KGKYVQIPTCAKDP   |
| nsp10   | 98                         | 112                      | B.1.351           | QIPTCAKDPVGFVL   |
| nsp10   | 103                        | 117                      | B.1.351           | CAKDPVGFVLKNTVC  |
| nsp12   | 309                        | 323                      | B.1.351           | HCANFNVLFTVFP    |
| nsp12   | 314                        | 328                      | B.1.351           | NVLFSTVFPVTSFGP  |
| nsp12   | 319                        | 333                      | B.1.351           | TVFPVTSFGPLVVRKI |

|       |      |      |         |                  |
|-------|------|------|---------|------------------|
| nsp14 | 316  | 330  | B.1.351 | VVKAALLADKFPFLH  |
| nsp14 | 321  | 335  | B.1.351 | LLADKFPFLHDIGNP  |
| nsp14 | 326  | 340  | B.1.351 | FPFLHDIGNPKAIKC  |
| S     | 6    | 20   | B.1.351 | VLLPLVSSQCVNFTT  |
| S     | 11   | 25   | B.1.351 | VSSQCVNFTTRTQLP  |
| S     | 16   | 30   | B.1.351 | VNFTTRTQLPAYTN   |
| S     | 66   | 80   | B.1.351 | HAIHVSNGTKRFA    |
| S     | 71   | 85   | B.1.351 | SGTNGTKRFANPVL   |
| S     | 76   | 90   | B.1.351 | TKRFANPVLFPNDGV  |
| S     | 201  | 215  | B.1.351 | FKIYSKHTPINLVRH  |
| S     | 201  | 215  | B.1.351 | FKIYSKHTPINLVRG  |
| S     | 206  | 220  | B.1.351 | KHTPINLVRHLPQGF  |
| S     | 206  | 220  | B.1.351 | KHTPINLVRGLPQGF  |
| S     | 211  | 225  | B.1.351 | NLVRHLPQGFSALEP  |
| S     | 211  | 225  | B.1.351 | NLVRGLPQGFSALEP  |
| E     | 61   | 75   | B.1.351 | RVKNLNSRVLDDL    |
| nsp2  | 71   | 85   | B.1.351 | LQTPFEIKLAKKFDI  |
| nsp2  | 76   | 90   | B.1.351 | EIKLAKKFDIFNGEC  |
| nsp2  | 81   | 95   | B.1.351 | KKFDIFNGECPNFVF  |
| nsp2  | 326  | 340  | B.1.351 | CGNFKVTGKAKKSA   |
| nsp2  | 331  | 345  | B.1.351 | VTGKAKKSAWNIGE   |
| nsp2  | 336  | 350  | B.1.351 | AKKSAWNIGEQKSIL  |
| nsp2  | 356  | 370  | B.1.351 | FASEAARVVRTIFSR  |
| nsp2  | 361  | 375  | B.1.351 | ARVVRTIFSRILETA  |
| nsp2  | 366  | 380  | B.1.351 | TIFSRILETAQNSVR  |
| nsp2  | 416  | 430  | B.1.351 | VVMAYITGGVVHLTS  |
| nsp2  | 421  | 435  | B.1.351 | ITGGVVHLTSQWLTN  |
| nsp2  | 426  | 440  | B.1.351 | VHLTSQWLTNIFGT   |
| nsp2  | 551  | 565  | B.1.351 | MPLKAPKEHFLDGE   |
| nsp2  | 556  | 570  | B.1.351 | PKEHFLDGETLPT    |
| nsp2  | 561  | 575  | B.1.351 | FLDGETLPTVLETEE  |
| nsp3  | 823  | 837  | B.1.351 | SFLGRYMSALNHTKN  |
| nsp3  | 828  | 842  | B.1.351 | YMSALNHTKNWKYPQ  |
| nsp3  | 833  | 847  | B.1.351 | NHTKNWKYPQVNGLT  |
| nsp3  | 1168 | 1182 | B.1.351 | LHKPIVWHVNNAIN   |
| nsp3  | 1173 | 1187 | B.1.351 | VWHVNNAINKATYKP  |
| nsp3  | 1178 | 1192 | B.1.351 | NAINKATYKPNTWCI  |
| nsp3  | 1768 | 1782 | B.1.351 | VAVKMFDAAYVSTFSS |
| nsp3  | 1773 | 1787 | B.1.351 | FDAYVSTFSSFNVP   |
| nsp3  | 1778 | 1792 | B.1.351 | STFSSFNVPMEKLG   |
| nsp13 | 577  | 591  | B.1.351 | SDRDLYDKLQFISLE  |
| nsp13 | 582  | 596  | B.1.351 | YDKLQFISLEIPRRN  |
| nsp13 | 587  | 601  | B.1.351 | FISLEIPRRNVATLQ  |
| nsp6  | 92   | 106  | B.1.351 | MRIMTWLDMVDTSLK  |
| nsp6  | 97   | 111  | B.1.351 | WLDMVDTSLKLKDCV  |
| nsp6  | 102  | 116  | B.1.351 | DTSLKLKDCVMYASA  |
| nsp6  | 107  | 121  | B.1.351 | LKDCVMYASAVLLI   |
| nsp6  | 122  | 136  | B.1.351 | LLILMTARTVYDDSA  |
| nsp6  | 127  | 141  | B.1.351 | TARTVYDDSARRVWT  |
| nsp6  | 132  | 146  | B.1.351 | YDDSARRVWTLMNVL  |
| nsp6  | 137  | 151  | B.1.351 | RRVWTLMNVLTLFYK  |
| nsp6  | 142  | 156  | B.1.351 | LMNVLTLYFYKVVYGN |
| nsp6  | 147  | 161  | B.1.351 | TLFYKVVYGNALDQA  |
| S     | 231  | 245  | B.1.351 | IGINITRFQTLHRSY  |
| S     | 236  | 250  | B.1.351 | TRFQTLHRSYLTTPGD |
| S     | 241  | 255  | B.1.351 | LHRSYLTTPGDSSSGW |
| S     | 406  | 420  | B.1.351 | EVROIAPGQTGNIA   |
| S     | 411  | 425  | B.1.351 | APGQTGNIAADYNYKL |
| S     | 416  | 430  | B.1.351 | GNIADYNYKLDDFT   |
| S     | 476  | 490  | B.1.351 | EIQAGSTPCNGVKG   |
| S     | 481  | 495  | B.1.351 | GSTPCNGVKGFNCYF  |
| S     | 486  | 500  | B.1.351 | NGVKGFNCYFPLQSY  |
| S     | 491  | 505  | B.1.351 | PLQSYGFQPTYGVGY  |
| S     | 496  | 510  | B.1.351 | GFQPTYGVGYQPYRV  |
| S     | 501  | 515  | B.1.351 | YGVGYQPYRVVLSF   |
| S     | 606  | 620  | B.1.351 | GTNTSNQVAVLYQGV  |
| S     | 611  | 625  | B.1.351 | NQVAVLYQGVNCTEV  |
| S     | 616  | 630  | B.1.351 | LYQGVNCTEVPVAIH  |
| S     | 691  | 705  | B.1.351 | SIIAYTMSLGVENS   |
| S     | 696  | 710  | B.1.351 | TMSLGVENSVAYSNN  |
| S     | 701  | 715  | B.1.351 | VENSVAYSNNSIAIP  |
| N     | 66   | 80   | P.1.    | FPRGQGVPIINTSSR  |
| N     | 71   | 85   | P.1.    | GVPIINTSSRDDQIG  |
| N     | 76   | 90   | P.1.    | TNSSRDDQIGYRRA   |
| N     | 191  | 205  | P.1.    | RNSSRNSIPGSSKRT  |
| N     | 196  | 210  | P.1.    | NSTPGSSKRTSPARM  |
| N     | 201  | 215  | P.1.    | SSKRTSPARMAGNGG  |
| ORF8  | 81   | 95   | P.1.    | VSCLPFTINCQKPKL  |
| ORF8  | 86   | 100  | P.1.    | FTINCQKPKLGLLVV  |
| ORF8  | 91   | 105  | P.1.    | QKPKLGLLVVRCSEFY |
| ORF3a | 241  | 255  | P.1.    | EEHVQIHTIDGSPGV  |
| ORF3a | 246  | 260  | P.1.    | IHTIDGSPGVNPM    |
| ORF3a | 251  | 265  | P.1.    | GSPGVNPMMEPIYD   |
| nsp12 | 309  | 323  | P.1.    | HCANFNVLSTVFPPL  |
| nsp12 | 314  | 328  | P.1.    | NVLFSTVFPPLTSFGP |
| nsp12 | 319  | 333  | P.1.    | TVFPPLTSFGPLVRKI |
| nsp13 | 327  | 341  | P.1.    | IDKCSRIPARARVD   |
| nsp13 | 332  | 346  | P.1.    | RIIPARARVDCFDFK  |
| nsp13 | 337  | 351  | P.1.    | RARVDCFDFKFNST   |
| S     | 6    | 20   | P.1.    | VLLPLVSSQCVNFTN  |
| S     | 11   | 25   | P.1.    | VSSQCVNFTNRTQLP  |
| S     | 16   | 30   | P.1.    | VNFTNRTQLPSAYTN  |
| S     | 21   | 35   | P.1.    | RTQLPSAYTNSFTRG  |
| S     | 26   | 40   | P.1.    | SAYTNSFTRGVYYPD  |
| S     | 126  | 140  | P.1.    | VVIKVECFQFCNYPF  |
| S     | 131  | 145  | P.1.    | CEFCNYPFLGVVY    |
| S     | 136  | 150  | P.1.    | CNYPFLGVVYHKNNK  |
| S     | 176  | 190  | P.1.    | LMDLEGKQGNFNKLS  |
| S     | 181  | 195  | P.1.    | GKQGNFNKLSFVFK   |

|       |      |      |         |                   |
|-------|------|------|---------|-------------------|
| S     | 186  | 200  | P.1.    | FNKLSSEFVKNDIGY   |
| S     | 406  | 420  | P.1.    | EVROQIAPGGQTGIAD  |
| S     | 411  | 425  | P.1.    | APGQGTIADYNYKL    |
| S     | 416  | 430  | P.1.    | GTIADYNYKLPDDFT   |
| S     | 471  | 485  | P.1.    | EIYQAGSTPCNGVKKG  |
| S     | 476  | 490  | P.1.    | GSTPCNGVKGFNCYF   |
| S     | 481  | 495  | P.1.    | NGVKGFNCYFPLQSY   |
| S     | 491  | 505  | P.1.    | PLQSYGFQPTYGVGY   |
| S     | 496  | 510  | P.1.    | GFQPTYGVGYQPYRV   |
| S     | 501  | 515  | P.1.    | YGVGYQPYRVVLSF    |
| S     | 601  | 615  | P.1.    | GTNTSNQVAVLYQGV   |
| S     | 606  | 620  | P.1.    | NQVAVLYQGVNCTEV   |
| S     | 611  | 625  | P.1.    | LYQGVNCTEVPVAIH   |
| S     | 641  | 655  | P.1.    | NVFQTRAGCLIGAEY   |
| S     | 646  | 660  | P.1.    | RAGCLIGAEYVNNNSY  |
| S     | 651  | 665  | P.1.    | IGAEYVNNNSYECDIP  |
| S     | 1016 | 1030 | P.1.    | AEIRASANLAAIKMS   |
| S     | 1021 | 1035 | P.1.    | SANLAAIKMSECVLG   |
| S     | 1026 | 1040 | P.1.    | AIKMSECVLGQSKRV   |
| S     | 1166 | 1180 | P.1.    | LGDISGINASFVNIQ   |
| S     | 1171 | 1185 | P.1.    | GINASFVNIQKEIDR   |
| S     | 1176 | 1190 | P.1.    | FVNIQKEIDRLNEVA   |
| nsp3  | 173  | 187  | P.1.    | QDGSSEDNQTTTQAI   |
| nsp3  | 178  | 192  | P.1.    | DNQTTTQAIVEVQP    |
| nsp3  | 183  | 197  | P.1.    | TIQAIVEVQPOLEME   |
| nsp3  | 358  | 372  | P.1.    | AVFDKNLVDKLVLSF   |
| nsp3  | 363  | 377  | P.1.    | NLYDKLVLSFLEMKS   |
| nsp3  | 368  | 382  | P.1.    | LVLVLSFLEMKSEKQVE |
| nsp3  | 963  | 977  | P.1.    | KGVPQICTCGKQATQ   |
| nsp3  | 968  | 982  | P.1.    | PCTCGKQATQYLVQQ   |
| nsp3  | 973  | 987  | P.1.    | KQATQYLVQQESPFFV  |
| nsp6  | 92   | 106  | P.1.    | MRIMTWLDMVDTSLK   |
| nsp6  | 97   | 111  | P.1.    | WLDMMVDTSLKDKCV   |
| nsp6  | 102  | 116  | P.1.    | DTSLKDKDCVMYASA   |
| nsp6  | 107  | 121  | P.1.    | LKDCVMYASAVVLLI   |
| N     | 191  | 205  | CAL.20C | RNSSRNSTPGSSKRI   |
| N     | 196  | 210  | CAL.20C | NSTPGSSKRISPARM   |
| N     | 201  | 215  | CAL.20C | SSKRISPARMAGNGG   |
| N     | 221  | 235  | CAL.20C | LLLLDRLNQLESKIS   |
| N     | 226  | 240  | CAL.20C | RLNQLESKISGKGQQ   |
| N     | 231  | 245  | CAL.20C | ESKISGKGQQQQGQT   |
| nsp2  | 71   | 85   | CAL.20C | LQTPFEIKLAKKFDI   |
| nsp2  | 76   | 90   | CAL.20C | EIKLAKKFDIFNGEC   |
| nsp2  | 81   | 95   | CAL.20C | KKFDIFNGECPNFVF   |
| nsp3  | 768  | 782  | CAL.20C | MSMTYGOQFGSTYLD   |
| nsp3  | 773  | 787  | CAL.20C | GOQFGSTYLDGADVT   |
| nsp3  | 778  | 792  | CAL.20C | STYLDGADVTKIKPH   |
| nsp4  | 383  | 397  | CAL.20C | ICISTKHFWFFTNY    |
| nsp4  | 388  | 402  | CAL.20C | KHFYWFFTNLKRVR    |
| nsp4  | 393  | 407  | CAL.20C | FFTNLKRVRVFNQV    |
| nsp6  | 112  | 126  | CAL.20C | DCVMYASAVVLLIFM   |
| nsp6  | 117  | 131  | CAL.20C | ASAVVLLIFMARTAR   |
| nsp6  | 122  | 136  | CAL.20C | LLIFMARTARVYDDGA  |
| nsp6  | 157  | 171  | CAL.20C | ALDQAISMWAFIISV   |
| nsp6  | 162  | 176  | CAL.20C | ISMWAFIISVTSNYS   |
| nsp6  | 167  | 181  | CAL.20C | FIIISVTSNYSVVTT   |
| nsp9  | 51   | 65   | CAL.20C | LKWARFPKSDGTGTV   |
| nsp9  | 56   | 70   | CAL.20C | FPKSDGTGTVYVTELE  |
| nsp9  | 61   | 75   | CAL.20C | GTGTVYVTELEPPCRF  |
| nsp12 | 309  | 323  | CAL.20C | HCANFNVLFTVFPPL   |
| nsp12 | 314  | 328  | CAL.20C | NVLFSTVFPPLTSFGP  |
| nsp12 | 319  | 333  | CAL.20C | TVFPPLTSFGPLVRKI  |
| nsp13 | 42   | 56   | CAL.20C | VLSVNPYVCNAPGCD   |
| nsp13 | 47   | 61   | CAL.20C | PYVCNAPGCDVTDVT   |
| nsp13 | 52   | 66   | CAL.20C | APGCDVTDVDTQLYLG  |
| nsp13 | 197  | 211  | CAL.20C | EYTFEKGDYGDAFVY   |
| nsp13 | 202  | 216  | CAL.20C | KGDYGDAFYVRGTTT   |
| nsp13 | 207  | 221  | CAL.20C | DAFYVRGTTTYKLVN   |
| nsp13 | 247  | 261  | CAL.20C | VRITGLYPLNLSYE    |
| nsp13 | 252  | 266  | CAL.20C | LYPPLNLSYEFSSNV   |
| nsp13 | 257  | 271  | CAL.20C | NISYEFSSNVANYQK   |
| nsp14 | 316  | 330  | CAL.20C | VVKAALLADKLPVLH   |
| nsp14 | 321  | 335  | CAL.20C | LLADKLPVLHDIGNP   |
| nsp14 | 326  | 340  | CAL.20C | LPVLHDIGNPKAIC    |
| nsp15 | 79   | 93   | CAL.20C | IAANTVIWDYKRYAP   |
| nsp15 | 84   | 98   | CAL.20C | VIWDYKRYAPAHIST   |
| nsp15 | 89   | 103  | CAL.20C | KRYAPAHISTIGVCS   |
| ORF3a | 46   | 60   | CAL.20C | LIVGVALAVFHSAS    |
| ORF3a | 51   | 65   | CAL.20C | ALLAVFHSASKIITL   |
| ORF3a | 56   | 70   | CAL.20C | FHSASKIITLKKRWQ   |
| S     | 1    | 15   | CAL.20C | MFVFLVLLPLVSIQC   |
| S     | 6    | 20   | CAL.20C | VLLPLVSIQCENLTT   |
| S     | 11   | 25   | CAL.20C | VSIQCENLTTRTQLP   |
| S     | 141  | 155  | CAL.20C | LGVYYHKNNKSCMES   |
| S     | 146  | 160  | CAL.20C | HKNNKSCMESEFRVY   |
| S     | 151  | 165  | CAL.20C | SCMESEFRVYSSANN   |
| S     | 441  | 455  | CAL.20C | LDSKVGGNYRYRRL    |
| S     | 446  | 460  | CAL.20C | GGNYRYRRLFRKSN    |
| S     | 451  | 465  | CAL.20C | YRYRRLFRKSNLKPFE  |
| S     | 601  | 615  | CAL.20C | GTNTSNQVAVLYQGV   |
| S     | 606  | 620  | CAL.20C | NQVAVLYQGVNCTEV   |
| S     | 611  | 625  | CAL.20C | LYQGVNCTEVPVAIH   |
| S     | 926  | 940  | CAL.20C | QFNSAIGKIQDSFSS   |
| S     | 931  | 945  | CAL.20C | IGKIQDSFSSASAL    |
| S     | 936  | 950  | CAL.20C | DSFSSASALGKLQD    |
| S     | 1181 | 1195 | CAL.20C | KEIDRLNEVANLNLE   |
| S     | 1186 | 1200 | CAL.20C | LNEVANLNLESLIDL   |
| S     | 1191 | 1205 | CAL.20C | NNLESLIDLQELGK    |



**Table S4.** Related to Figure 4. Effect of mutations on CD8 epitope HLA class I binding capacity

| Origin  | Ancestral reference sequence | Protein | Start | Mutation <sup>a</sup> | Mutated sequence <sup>b</sup> | HLA restriction | WT (IC <sub>50</sub> nM) <sup>c</sup> | Mutant (IC <sub>50</sub> nM) | Fold difference | Effect <sup>d</sup> |
|---------|------------------------------|---------|-------|-----------------------|-------------------------------|-----------------|---------------------------------------|------------------------------|-----------------|---------------------|
| B.1.1.7 | HVSGTNGTK                    | S       | 69    | HV69-70 del           | HAISGTNGTK                    | A*68:01         | 55                                    | 44                           | 0.8             | Neutral             |
| B.1.1.7 | GYYYHKNNK                    | S       | 142   | Y145 del              | FLGVYHKNNK                    | A*03:01         | 28                                    | 1078                         | 39              | Decrease            |
| B.1.1.7 | YYHKNNKSW                    | S       | 144   | Y145 del              | VYHKNNKSW                     | A*24:02         | 117                                   | 308                          | 2.6             | Decrease            |
| B.1.1.7 | YGFQPTNGV                    | S       | 495   | N501Y                 | YGFQPTYGV                     | B*51:01         | 3488                                  | 3541                         | 1.0             | Neutral             |
| B.1.1.7 | YQDVNCTEV                    | S       | 612   | D614G                 | YQGVNCTEV                     | A*02:06         | 18                                    | 57                           | 3.2             | Decrease            |
| B.1.1.7 | QTNSPRRAR                    | S       | 677   | P681H                 | QTNSHRRAR                     | A*31:01         | 35                                    | 33                           | 0.94            | Neutral             |
| B.1.1.7 | SPRRARSV                     | S       | 680   | P681H                 | SHRRARSV                      | B*08:01         | 429                                   | 2449                         | 5.7             | Decrease            |
| B.1.1.7 | NSIAIPTNF                    | S       | 710   | T716I                 | NSIAIPINF                     | B*57:01         | 1335                                  | 968                          | 0.73            | Neutral             |
| B.1.1.7 | IAIPTNFTI                    | S       | 712   | T716I                 | IAIPINF TI                    | B*51:01         | 209                                   | 189                          | 0.90            | Neutral             |
| B.1.1.7 | IAIPTNFTI                    | S       | 712   | T716I                 | IAIPINF TI                    | B*53:01         | 396                                   | 266                          | 0.67            | Neutral             |
| B.1.1.7 | IPTNFTISV                    | S       | 714   | T716I                 | IPINF TISV                    | B*07:02         | 188                                   | 168                          | 0.89            | Neutral             |
| B.1.1.7 | IPTNFTISV                    | S       | 714   | T716I                 | IPINF TISV                    | B*51:01         | 156                                   | 94                           | 0.60            | Neutral             |
| B.1.1.7 | SVLNDILSR                    | S       | 975   | S982A                 | SVLNDILAR                     | A*68:01         | 109                                   | 92                           | 0.84            | Neutral             |
| B.1.1.7 | KLINIIWF                     | nsp3    | 1407  | I1412T                | KLINITIWF                     | A*32:01         | 161                                   | 48                           | 0.30            | Increase            |
| B.1.1.7 | STVFPPTSF                    | nsp12   | 318   | P323L                 | STVFPLTSF                     | B*57:01         | 1583                                  | 637                          | 0.40            | Increase            |
| B.1.351 | RFDNPVLPF                    | S       | 78    | D80A                  | RFANPVLPF                     | A*24:02         | 458                                   | 34                           | 0.075           | Increase            |
| B.1.351 | FDNPVLPFNDGVYF               | S       | 79    | D80A                  | FANPVLPFNDGVYF                | B*35:01         | 65                                    | 65                           | 1.0             | Neutral             |
| B.1.351 | TPINLVRDL                    | S       | 208   | D215G                 | TPINLVRGL                     | B*07:02         | 213                                   | 119                          | 0.56            | Neutral             |
| B.1.351 | TPINLVRDL                    | S       | 208   | D215H                 | TPINLVRHL                     | B*07:02         | 213                                   | 199                          | 0.93            | Neutral             |
| B.1.351 | QIAPGQTGK                    | S       | 409   | K417N                 | QIAPGQTGN                     | A*68:01         | 137                                   | 27998                        | 204             | Decrease            |
| B.1.351 | YGFQPTNGV                    | S       | 495   | N501Y                 | YGFQPTYGV                     | B*51:01         | 3488                                  | 3541                         | 1.0             | Neutral             |
| B.1.351 | YQDVNCTEV                    | S       | 612   | D614G                 | YQGVNCTEV                     | A*02:06         | 18                                    | 57                           | 3.2             | Decrease            |
| B.1.351 | YTMSLGAENSVAY                | S       | 695   | A701V                 | YTMSLGVENSVAY                 | A*26:01         | 184                                   | 253                          | 1.4             | Neutral             |
| B.1.351 | LGAENSVAY                    | S       | 699   | A701V                 | LGVENSVAY                     | B*35:01         | 19                                    | 21                           | 1.1             | Neutral             |
| B.1.351 | GPQNQRNAPRITF                | N       | 5     | K17N                  | GPQNQRNASRITF                 | B*07:02         | 640                                   | 696                          | 1.1             | Neutral             |
| B.1.351 | QSASKIITL                    | ORF3a   | 57    | Q57H                  | HSASKIITL                     | B*08:01         | 1788                                  | 573                          | 0.32            | Increase            |
| B.1.351 | MSALNHTKK                    | nsp3    | 829   | K837N                 | MSALNHTKN                     | A*30:01         | 102                                   | 7035                         | 69              | Decrease            |
| B.1.351 | MSALNHTKKW                   | nsp3    | 829   | K837N                 | MSALNHTKNW                    | B*57:01         | 16                                    | 14                           | 0.88            | Neutral             |
| B.1.351 | SALNHTKKW                    | nsp3    | 830   | K837N                 | SALNHTKNW                     | B*57:01         | 111                                   | 93                           | 0.84            | Neutral             |
| B.1.351 | STVFPPTSF                    | nsp12   | 318   | P323L                 | STVFPLTSF                     | B*57:01         | 1583                                  | 637                          | 0.40            | Increase            |
| P.1.    | LPPAYTNSF                    | S       | 24    | P26S                  | LPSAYTNSF                     | B*07:02         | 294                                   | 51                           | 0.17            | Increase            |
| P.1.    | LPPAYTNSF                    | S       | 24    | P26S                  | LPSAYTNSF                     | B*35:01         | 44                                    | 4.1                          | 0.093           | Increase            |
| P.1.    | LPPAYTNSF                    | S       | 24    | P26S                  | LPSAYTNSF                     | B*53:01         | 366                                   | 18                           | 0.049           | Increase            |
| P.1.    | QIAPGQTGK                    | S       | 409   | K417T                 | QIAPGQTGT                     | A*68:01         | 137                                   | 20478                        | 149             | Decrease            |
| P.1.    | YGFQPTNGV                    | S       | 495   | N501Y                 | YGFQPTYGV                     | B*51:01         | 3488                                  | 3541                         | 1.0             | Neutral             |
| P.1.    | YQDVNCTEV                    | S       | 612   | D614G                 | YQGVNCTEV                     | A*02:06         | 18                                    | 57                           | 3.2             | Decrease            |
| P.1.    | AEHVNNSY                     | S       | 653   | H655Y                 | AEYVNNSY                      | B*44:02         | 1038                                  | 904                          | 0.87            | Neutral             |
| P.1.    | AEHVNNSY                     | S       | 653   | H655Y                 | AEYVNNSY                      | B*44:03         | 1020                                  | 577                          | 0.57            | Neutral             |
| P.1.    | RASANLAATK                   | S       | 1019  | L1027I                | RASANLAAIK                    | A*03:01         | 85                                    | 99                           | 1.2             | Neutral             |
| P.1.    | NASVVNIQK                    | S       | 1173  | V1176F                | NASVNIQK                      | A*68:01         | 13                                    | 6.2                          | 0.48            | Increase            |
| P.1.    | NTNSSPDDQIGYY                | N       | 75    | P80R                  | NTNSSRDDQIGYY                 | A*01:01         | 44                                    | 44                           | 1.0             | Neutral             |
| P.1.    | SPDDQIGYY                    | N       | 79    | P80R                  | SRDDQIGYY                     | B*35:01         | 101                                   | 17781                        | 175             | Decrease            |
| P.1.    | LYDKLVSSF                    | nsp3    | 364   | S370L                 | LYDKLVLSF                     | A*24:02         | 77                                    | 70                           | 0.91            | Neutral             |
| P.1.    | STVFPPTSF                    | nsp12   | 318   | P323L                 | STVFPLTSF                     | B*57:01         | 1583                                  | 637                          | 0.40            | Increase            |
| CAL.20C | LPLVSSQCV                    | S       | 8     | S13I                  | LPLVSIQCV                     | B*51:01         | 402                                   | 272                          | 0.68            | Neutral             |
| CAL.20C | YYHKNNKSW                    | S       | 144   | W152C                 | YYHKNNKSC                     | A*24:02         | 117                                   | 11134                        | 95              | Decrease            |
| CAL.20C | SWMESEFRVY                   | S       | 151   | W152C                 | SCMESEFRVY                    | A*29:02         | 49                                    | 980                          | 20              | Decrease            |
| CAL.20C | KVGGNYNYLY                   | S       | 444   | L452R                 | KVGGNYNYRY                    | A*29:02         | 101                                   | 505                          | 5.0             | Decrease            |
| CAL.20C | VGGNYNYLY                    | S       | 445   | L452R                 | VGGNYNYRY                     | A*29:02         | 94                                    | 519                          | 5.5             | Decrease            |
| CAL.20C | NYNLYRLF                     | S       | 448   | L452R                 | NYNRYRLF                      | A*24:02         | 21                                    | 108                          | 5.1             | Decrease            |
| CAL.20C | YNLYRFLR                     | S       | 449   | L452R                 | YNRYRFLR                      | A*31:01         | 16                                    | 12                           | 0.75            | Neutral             |
| CAL.20C | YQDVNCTEV                    | S       | 612   | D614G                 | YQGVNCTEV                     | A*02:06         | 18                                    | 57                           | 3.2             | Decrease            |
| CAL.20C | QSASKIITL                    | ORF3a   | 57    | Q57H                  | HSASKIITL                     | B*08:01         | 1788                                  | 573                          | 0.32            | Increase            |
| CAL.20C | WFFSNYLKR                    | nsp4    | 392   | S395T                 | WFFTNYLKR                     | A*31:01         | 70                                    | 98                           | 1.4             | Neutral             |
| CAL.20C | STVFPPTSF                    | nsp12   | 318   | P323L                 | STVFPLTSF                     | B*57:01         | 1583                                  | 637                          | 0.40            | Increase            |

<sup>a</sup>Mutation noted as ancestral residue-position-variant residue. Del refers to deletion of the corresponding residue.<sup>b</sup>For deletion mutants, the peptide sequence shown represents the variant encompassing the same region that has the highest predicted binding affinity for the corresponding restricting allele.<sup>c</sup>Indicates predicted IC<sub>50</sub> for the corresponding reported restricting allele. Predictions were performed using the NetMHCpan BA 4.1 algorithm, hosted by the IEDB.<sup>d</sup>Increase/decrease in affinity defined by a two-fold difference in predicted IC<sub>50</sub> nM.
